# Supplementary material for: Lipid-Encapsuled Grape Tannins Prevent Oxidative-Stress-Induced Neuronal Cell Death, Intracellular ROS Accumulation and Inflammation
Source: MDPI journal article supplement (doi:10.3390/antiox11101928), 2022-09-28
Supplement: s1 [file s1]

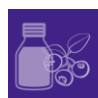

## Supplementary Material

Table S1. TS characterization by UV-HPLC Analysis.

| Analysis                            | TS                    | TLS                   |
|-------------------------------------|-----------------------|-----------------------|
|                                     | Concentration (mg/L)  | Concentration (mg/L)  |
| Gallic acid                         | 3.2                   | 2.9                   |
| Catechin (terminal)                 | 71.3                  | 64.8                  |
| Catechin Cysteine                   | 66.9                  | 60.9                  |
| Epicatechin                         | 22.2                  | 20.2                  |
| Epicatechin Cys.                    | 24.7                  | 22.5                  |
| Catechin gallate                    | 46.8                  | 42.6                  |
| Epicatechin gallate                 | 3.1                   | 2.8                   |
| Epicatechin gallate cys.            | 8.7                   | 7.9                   |
| Procyanidin B1(cis-trans)           | 6.1                   | 5.5                   |
| Procyanidin B2 (cis-cis)            | Under detection limit | Under detection limit |
| Gallolization (%G)                  | 68.8                  | 62.6                  |
| Mean Degree of Polymerization (mDP) | 2.02                  | 1.83                  |

The identification of the compounds was carried out by means of a depolymerization of tannins in acidic methanol and in the presence of toluene- $\alpha$ -thiol or cysteamine hydrochloride (acid thiolysis) and subsequent HPLC-UV analysis using a wavelength of 280 nm.

Table S2. 18S housekeeping gene standardization.

| Sample ID                            | CT           | Delta CT | Mean        | Fold-change                              |
|--------------------------------------|--------------|----------|-------------|------------------------------------------|
| Control 1                            | 11.43        | -0.04    | -0.14       | 1.10                                     |
|                                      | 11.24        | -0.23    |             |                                          |
| Control 2                            | 12.00        | 0.53     | 0.25        | 0.84                                     |
|                                      | 11.44        | -0.03    |             |                                          |
| Control 3                            | 11.50        | 0.03     | -0.03       | 1.02                                     |
|                                      | 11.38        | -0.09    |             |                                          |
| Control 4                            | 11.11        | -0.36    | -0.22       | 1.16                                     |
|                                      | 11.40        | -0.07    |             |                                          |
| Control 5                            | 12.00        | 0.53     | 0.16        | 0.90                                     |
|                                      | 11.26        | -0.21    | <b>mean</b> | <b>1.00 <math>\pm</math> 0.13</b>        |
| <b>Geometric mean</b>                | <b>11.47</b> |          |             |                                          |
| H <sub>2</sub> O <sub>2</sub> 1      | 11.15        | -0.32    | -0.39       | 1.31                                     |
|                                      | 11.02        | -0.45    |             |                                          |
| H <sub>2</sub> O <sub>2</sub> 2      | 11.81        | 0.34     | 0.44        | 0.74                                     |
|                                      | 12.01        | 0.54     |             |                                          |
| H <sub>2</sub> O <sub>2</sub> 3      | 12.00        | 0.53     | 0.28        | 0.82                                     |
|                                      | 11.51        | 0.04     |             |                                          |
| H <sub>2</sub> O <sub>2</sub> 4      | 11.52        | 0.05     | 0.09        | 0.94                                     |
|                                      | 11.60        | 0.13     |             |                                          |
| H <sub>2</sub> O <sub>2</sub> 5      | 11.04        | -0.43    | -0.24       | 1.18                                     |
|                                      | 11.42        | -0.05    | <b>mean</b> | <b>1.00 <math>\pm</math> 0.24 (n.s.)</b> |
| H <sub>2</sub> O <sub>2</sub> +TLS 1 | 11.90        | 0.43     | 0.07        | 0.95                                     |
|                                      | 11.19        | -0.28    |             |                                          |
| H <sub>2</sub> O <sub>2</sub> +TLS 2 | 11.73        | 0.26     | -0.02       | 1.02                                     |
|                                      | 11.17        | -0.30    |             |                                          |

|                                      |       |       |             |                           |
|--------------------------------------|-------|-------|-------------|---------------------------|
| H <sub>2</sub> O <sub>2</sub> +TLS 3 | 11.00 | -0.47 | -0.10       | 1.07                      |
|                                      | 11.75 | 0.28  |             |                           |
| H <sub>2</sub> O <sub>2</sub> +TLS 4 | 11.37 | -0.10 | -0.25       | 1.19                      |
|                                      | 11.08 | -0.39 |             |                           |
| H <sub>2</sub> O <sub>2</sub> +TLS 5 | 11.59 | 0.12  | 0.42        | 0.75                      |
|                                      | 12.19 | 0.72  | <b>mean</b> | <b>0.99 ± 0.16 (n.s.)</b> |
| H <sub>2</sub> O <sub>2</sub> +LS 1  | 11.08 | -0.39 | -0.15       | 1.11                      |
|                                      | 11.56 | 0.09  |             |                           |
| H <sub>2</sub> O <sub>2</sub> +LS 2  | 12.08 | 0.61  | 0.52        | 0.70                      |
|                                      | 11.90 | 0.43  |             |                           |
| H <sub>2</sub> O <sub>2</sub> +LS 3  | 11.08 | -0.39 | -0.15       | 1.11                      |
|                                      | 11.56 | 0.09  | <b>mean</b> | <b>0.97 ± 0.24 (n.s.)</b> |
| H <sub>2</sub> O <sub>2</sub> +TS 1  | 11.75 | 0.28  | 0.09        | 0.94                      |
|                                      | 11.37 | -0.10 |             |                           |
| H <sub>2</sub> O <sub>2</sub> +TS 2  | 12.08 | 0.61  | 0.36        | 0.78                      |
|                                      | 11.59 | 0.12  |             |                           |
| H <sub>2</sub> O <sub>2</sub> +TS 3  | 12.19 | 0.72  | 0.50        | 0.71                      |
|                                      | 11.75 | 0.28  |             |                           |
| H <sub>2</sub> O <sub>2</sub> +TS 4  | 11.37 | -0.10 | -0.25       | 1.19                      |
|                                      | 11.08 | -0.39 |             |                           |
| H <sub>2</sub> O <sub>2</sub> +TS 5  | 11.59 | 0.12  | -0.08       | 1.06                      |
|                                      | 11.19 | -0.28 | <b>mean</b> | <b>0.93 ± 0.20 (n.s.)</b> |

**Scheme 2.** <sup>CT</sup> value of mean delta CT against the geometric mean of Control samples was used. qPCR reactions were performed in duplicate for each sample. One-way ANOVA and Bonferroni's post hoc test. n.s. indicates no significant

differences vs. Control.

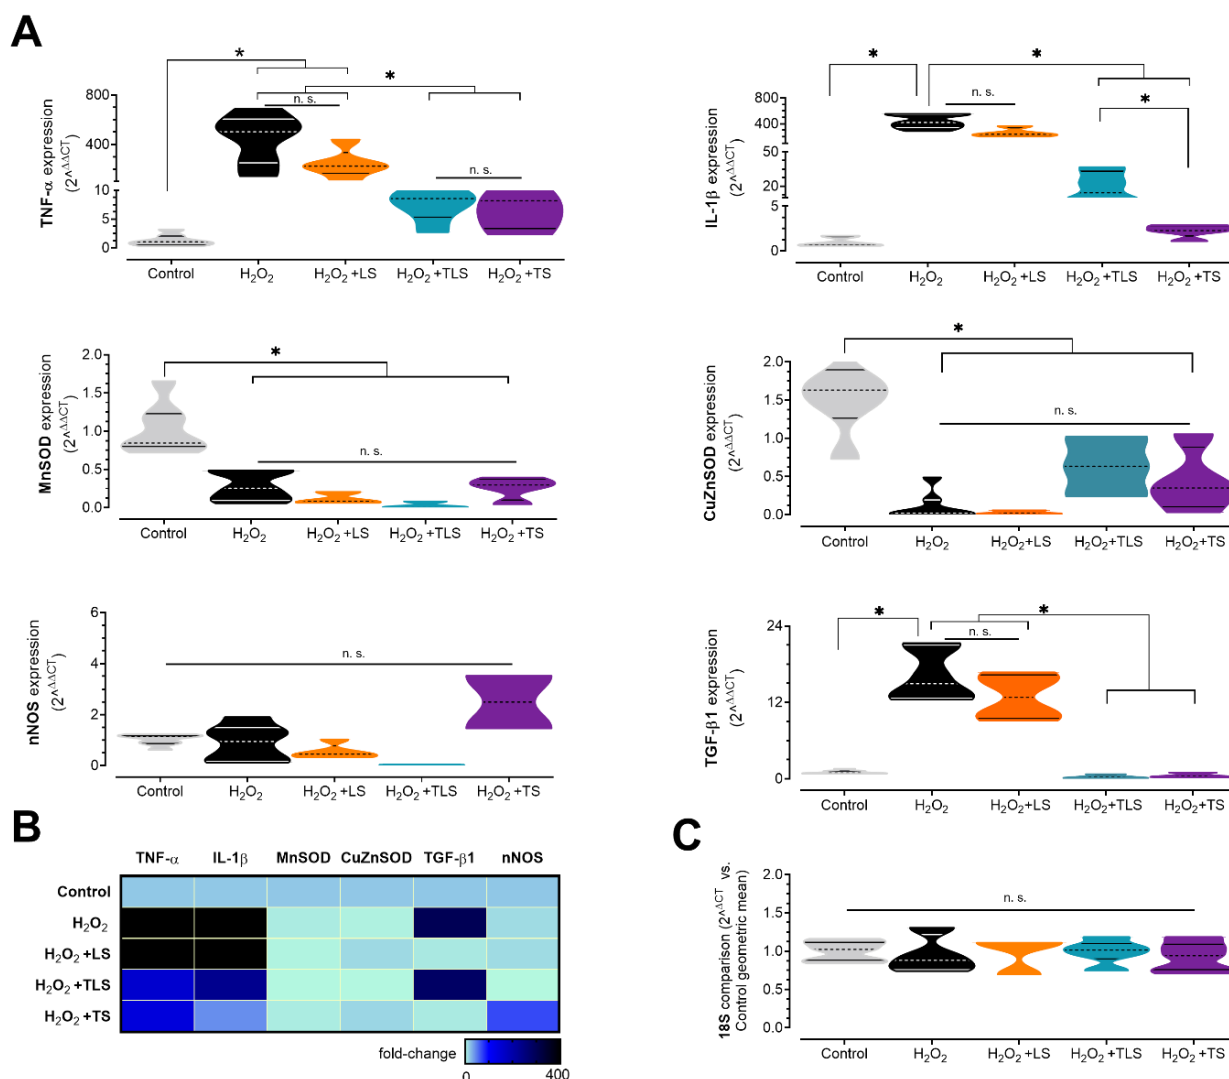

**Figure S1.** Effect of free tannins suspension and lipid-encapsulated grape tannins on neuroinflammatory biomarkers under oxidative stress conditions. A) Results of qPCR by the  $2^{-\Delta\Delta CT}$  method showing mRNA expression of proinflammatory biomarkers, antioxidant enzymes and anti-inflammatory biomarkers. B) Heat map showing the average mRNA expression (geometric mean) of gene targets evaluated in A). C) Graphical summary of 18S gene standardization after  $2^{-\Delta CT}$  normalization of H<sub>2</sub>O<sub>2</sub>-treated cells against the geometric mean of Control CT values. n = 5 for Control, H<sub>2</sub>O<sub>2</sub>, H<sub>2</sub>O<sub>2</sub>+TLS and H<sub>2</sub>O<sub>2</sub>+TS; n = 3 for H<sub>2</sub>O<sub>2</sub>+LS, on which each n represents a different batch of CAD cells. One-way ANOVA and Bonferroni post hoc tests. \*: p<0.05. Normal distribution was assessed by Shapiro-Wilk test (W values 0.8882; 0.9513; 0.8503; 0.9070; 0.8523; Control, H<sub>2</sub>O<sub>2</sub>, H<sub>2</sub>O<sub>2</sub>+TLS; H<sub>2</sub>O<sub>2</sub>+TS and H<sub>2</sub>O<sub>2</sub>+LS, respectively; p>0.05).
